# Supplementary material for: Paired Serum and Urine Concentrations of Biomarkers of Diethyl Phthalate, Methyl Paraben, and Triclosan in Rats
Source: PubMed Central journal article supplement (PMC4710607; doi:10.1289/ehp.1409586), 2015-06-05
Supplement: ehp.1409586.s001.acco.pdf [file ehp.1409586.s001.acco.pdf]

**Note to Readers:** *EHP* strives to ensure that all journal content is accessible to all readers. However, some figures and Supplemental Material published in *EHP* articles may not conform to 508 standards due to the complexity of the information being presented. If you need assistance accessing journal content, please contact [ehp508@niehs.nih.gov](mailto:ehp508@niehs.nih.gov). Our staff will work with you to assess and meet your accessibility needs within 3 working days.

## **Supplemental Material**

### **Paired Serum and Urine Concentrations of Biomarkers of Diethyl Phthalate, Methyl Paraben, and Triclosan in Rats**

Susan L. Teitelbaum, Qian Li, Luca Lambertini, Fiorella Belpoggi, Fabiana Manservigi, Laura Falcioni, Luciano Bua, Manori J. Silva, Xiaoyun Ye, Antonia M. Calafat, and Jia Chen

#### **Table of Contents**

**Table S1.** Individual animal serum biomarker concentrations (ng/ml).

**Table S2.** Literature for animal studies on triclosan, diethyl phthalate and methyl paraben.

**References**

**Table S1.** Individual animal serum biomarker concentrations (ng/ml).

| Experimental Groups<br>- Administered chemical | Serum Concentration (ng/ml) |                |           |
|------------------------------------------------|-----------------------------|----------------|-----------|
|                                                | Mono-ethyl phthalate        | Methyl paraben | Triclosan |
| <b>Olive oil alone</b>                         |                             |                |           |
| Sample I                                       | 181                         | 0.7            | <LOD      |
| Sample II                                      | 155                         | 1.7            | <LOD      |
| Sample III                                     | 79                          | 0.6            | <LOD      |
| Sample IV                                      | 139                         | 1              | <LOD      |
| Sample V                                       | 127                         | 0.8            | <LOD      |
| <b>Methyl paraben</b>                          |                             |                |           |
| NOAEL/100,000, 0.0105 mg/Kg/day                |                             |                |           |
| Sample I                                       | 9.1                         | 2.4            | <LOD      |
| Sample II                                      | 11.1                        | 1.8            | <LOD      |
| Sample III                                     | 9.8                         | 1.3            | <LOD      |
| Sample IV                                      | 11.7                        | 1.2            | <LOD      |
| Sample V                                       | 11.3                        | 1.5            | <LOD      |
| <b>Triclosan</b>                               |                             |                |           |
| NOAEL/10,000, 0.0005 mg/Kg/day                 |                             |                |           |
| Sample I                                       | 16.2                        | <LOD           | 190       |
| Sample II                                      | 14.4                        | <LOD           | 206       |
| Sample III                                     | 15.5                        | <LOD           | 152       |
| Sample IV                                      | 12.3                        | <LOD           | 141       |
| Sample V                                       | 11.2                        | <LOD           | 241       |
| <b>Diethyl phthalate</b>                       |                             |                |           |
| NOAEL/10,000, 0.01735 mg/Kg/day                |                             |                |           |
| Sample I                                       | 11.7                        |                |           |
| Sample II                                      | 6.2                         |                |           |
| Sample III                                     | 29.4                        |                |           |
| Sample IV                                      | 12.4                        |                |           |
| Sample V                                       | 19.1                        |                |           |
| NOEL/1,000, 0.1735 mg/Kg/day                   |                             |                |           |
| Sample I                                       | 28.3                        |                |           |
| Sample II                                      | 29.8                        |                |           |
| Sample III                                     | 6.9                         |                |           |
| Sample IV                                      | 19.3                        |                |           |
| Sample V                                       | 24                          |                |           |
| NOEL/200, 8.675 mg/Kg/day                      |                             |                |           |
| Sample I                                       | 22.1                        |                |           |
| Sample II                                      | 8.7                         |                |           |
| Sample III                                     | 19.1                        |                |           |
| Sample IV                                      | 16.4                        |                |           |
| Sample V                                       | 29.3                        |                |           |

**Table S2.** Literature for animal studies on triclosan, diethyl phthalate and methyl paraben.

| <b>Chemicals</b> | <b>Source</b>                | <b>Title</b>                                                                                                                                            | <b>Animal</b>                        | <b>Dose</b>                                                                          | <b>Administration route</b> | <b>Duration of exposure</b>                             | <b>Outcome</b>                                                                                                                                                                               |
|------------------|------------------------------|---------------------------------------------------------------------------------------------------------------------------------------------------------|--------------------------------------|--------------------------------------------------------------------------------------|-----------------------------|---------------------------------------------------------|----------------------------------------------------------------------------------------------------------------------------------------------------------------------------------------------|
| Triclosan        | (Louis et al. 2013)          | The effect of triclosan on the uterotrophic response to extended doses of ethinyl estradiol in the weanling rat                                         | Weanling Wistar rats                 | The series of TCS concentrations included 2.3, 4.69, 9.375, 18.75, and 37.5 mg/kg BW | Oral gavage                 | Postnatal days: 19-21                                   | To evaluate the effect of TCS co-exposure with lower doses of ethinyl estradiol                                                                                                              |
| Triclosan        | (Paul et al. 2012)           | Developmental triclosan exposure decreases maternal, fetal, and early neonatal thyroxine: a dynamic and kinetic evaluation of a putative mode-of-action | Time-pregnant Long-Evans female rats | 0, 10, 30, 100, and 300 mg/kg/day                                                    | Oral gavage                 | From gestational day 6 through postnatal day 21         | To examine whether TCS decreases thyroxine (T4) in dams and offspring via up-regulation of hepatic catabolism                                                                                |
| Triclosan        | (Jung et al. 2012)           | Potential estrogenic activity of triclosan in the uterus of immature rats and rat pituitary GH3 cells                                                   | Sprague-Dawley females immature rats | TCS at doses of 7.5, 37.4, and 187.5 mg/kg                                           | Oral gavage                 | Postnatal days: 19-21                                   | To screen estrogenic activity of TCS in the uteri of immature rats                                                                                                                           |
| Triclosan        | (Rodriguez and Sanchez 2010) | Maternal exposure to triclosan impairs thyroid homeostasis and female pubertal development in Wistar rat offspring                                      | Nulliparous female Wistar rats       | Triclosan at dose of 0, 1, 10, or 50 mg/kg/d                                         | Drinking water              | 8 days prior to mating; through gestation and lactation | To examine Effects of maternal exposure to triclosan on thyroid homeostasis (TH) and reproductive-tract development                                                                          |
| Triclosan        | (Paul et al. 2010a)          | Developmental triclosan exposure decreases maternal and neonatal thyroxine in rats                                                                      | Time-pregnant Long-Evans female rats | The dosing solutions (0, 30, 100, and 300 mg/ml)                                     | Oral gavage                 | From gestational day 6 through postnatal day 21         | To test the hypothesis that perinatal triclosan exposure will alter circulating thyroid hormone levels in pups during early postnatal development and in dams at the conclusion of lactation |

| <b>Chemicals</b> | <b>Source</b>          | <b>Title</b>                                                                                                                 | <b>Animal</b>                       | <b>Dose</b>                                                                      | <b>Administration route</b> | <b>Duration of exposure</b> | <b>Outcome</b>                                                                                                      |
|------------------|------------------------|------------------------------------------------------------------------------------------------------------------------------|-------------------------------------|----------------------------------------------------------------------------------|-----------------------------|-----------------------------|---------------------------------------------------------------------------------------------------------------------|
| Triclosan        | (Stoker et al. 2010)   | Triclosan exposure modulates estrogen-dependent responses in the female wistar rat                                           | Female Wistar rat                   | Doses of triclosan: 1.18, 2.35, 4.69, 9.37, 18.75, 37.5, 75, 150, and 300 mg/kg  | Oral gavage                 | Postnatal days: 22-42       | To evaluate the effects of triclosan                                                                                |
| Triclosan        | (Wu et al. 2009)       | Investigation on metabolism and pharmacokinetics of triclosan in rat plasma by using UPLC-triple quadrupole MS               | Sprague-Dawley rats                 | Oral administration of 5 mg/kg triclosan                                         | Oral administration         | Single bolus                | To understand the pharmacokinetics and metabolism of triclosan in animal and human body                             |
| Triclosan        | (Paul et al. 2010b)    | Short-term exposure to triclosan decreases thyroxine in vivo via upregulation of hepatic catabolism in Young Long-Evans rats | Female Long-Evans rats              | The dosing solutions (0, 10, 30, 100, 300, and 1000 mg/kg/day)                   | Oral gavage                 | 4 days                      | To test the hypothesis that triclosan decreases circulating T4 via upregulation of hepatic catabolism and transport |
| Triclosan        | (Kumar et al. 2009)    | Alteration of testicular teroidogenesis and histopathology of reproductive system in male rats treated with triclosan        | Male Wistar rats, Rattus norvegicus | Three dose levels: 5, 10 and 20 mg/kg/day                                        | Intubation                  | 60 days                     | To elucidate the probable mode of action of TCS as an antiandrogenic compound                                       |
| Triclosan        | (Zorrilla et al. 2009) | The effects of triclosan on puberty and thyroid hormones in male Wistar rats                                                 | Weanling rats                       | 0, 3, 30, 100, 200, or 300 mg/kg of triclosan                                    | Oral gavage                 | Postnatal days: 23-53       | To determine effects of triclosan on pubertal development and thyroid hormone concentrations                        |
| Triclosan        | (Crofton et al. 2007)  | Short-term in vivo exposure to the water contaminant triclosan: Evidence for disruption of thyroxine                         | Weanling female Long-Evans rats     | The dosing solutions at concentrations of 0, 10, 30, 100, 300 and 1000 mg/kg/day | Oral gavage                 | Postnatal days: 27-29       | To test the hypothesis that triclosan alters circulating concentrations of thyroxine                                |

| <b>Chemicals</b>  | <b>Source</b>          | <b>Title</b>                                                                                                                            | <b>Animal</b>            | <b>Dose</b>                                                                                                                                                                                                     | <b>Administration route</b> | <b>Duration of exposure</b>                               | <b>Outcome</b>                                                                                                                                               |
|-------------------|------------------------|-----------------------------------------------------------------------------------------------------------------------------------------|--------------------------|-----------------------------------------------------------------------------------------------------------------------------------------------------------------------------------------------------------------|-----------------------------|-----------------------------------------------------------|--------------------------------------------------------------------------------------------------------------------------------------------------------------|
| Diethyl phthalate | (Kwack et al. 2009)    | Comparative toxicological evaluation of phthalate diesters and metabolites in Sprague-Dawley male rats for risk assessment              | Sprague-Dawley male rats | The phthalate diesters (500 mg/kg/d)                                                                                                                                                                            | Oral gavage                 | 4 weeks                                                   | To comparatively assess the systemic toxicity and sperm parameters, nine phthalate diesters                                                                  |
| Diethyl phthalate | (Pereira et al. 2007a) | Chronic toxicity of diethyl phthalate-A three generation lactational and gestational exposure study on male Wistar rats                 | Wistar rats              | 50mg/kg of the diet/day; 25mg/kg of the diet/day for F1 generation and 10mg/kg of the diet/day for F2 generation. 10, 25 and 50 mg/kg of the diet/day, which is equal to 0.57, 1.425 and 2.85 mg/kg body wt/day | Oral gavage                 | Throughout mating, gestation until termination at weaning | To understand the dose-response toxic effect of DEP over three generations in male Wistar rats                                                               |
| Diethyl phthalate | (Pereira et al. 2007b) | A two-generation chronic mixture toxicity study of Clophen A60 and diethyl phthalate on histology of adrenal cortex and thyroid of rats | Wistar rats              | 50mg/kg of the diet/day                                                                                                                                                                                         | Oral gavage                 | Throughout mating, gestation until termination at weaning | To observe the type of interaction that exists between polychlorinated biphenyls (Clophen A60) and diethyl phthalate (DEP) on the adrenal and thyroid glands |
| Diethyl phthalate | (Pereira and Rao 2006) | Combined and individual administration of diethyl phthalate and polychlorinated biphenyls and its toxicity in female Wistar rats        | Female Wistar rats       | with the diet at 50 mg/(kg diet day) (approximately 2.85 mg/(kg body weight day))                                                                                                                               | Oral gavage                 | 150 days                                                  | To evaluate the interactive toxicity of DEP and PCBs in young female Wistar rats                                                                             |

| <b>Chemicals</b>  | <b>Source</b>           | <b>Title</b>                                                                                                                                                                | <b>Animal</b>        | <b>Dose</b>                                                | <b>Administration route</b> | <b>Duration of exposure</b>                                                                                   | <b>Outcome</b>                                                                                          |
|-------------------|-------------------------|-----------------------------------------------------------------------------------------------------------------------------------------------------------------------------|----------------------|------------------------------------------------------------|-----------------------------|---------------------------------------------------------------------------------------------------------------|---------------------------------------------------------------------------------------------------------|
| Diethyl phthalate | (Pereira and Rao 2007)  | Toxicity study of maternal transfer of polychlorinated biphenyls and diethyl phthalate to 21-day-old male and female weanling pups of Wistar rats                           | Wistar rats          | 50 mg/kg of the diet (2.85 mg/kg body wt)                  | Oral gavage                 | Throughout mating, gestation until termination at weaning                                                     | To evaluate the interactive toxicity of DEP and PCB in 21-day-old male and female pups of Wistar rats   |
| Diethyl phthalate | (Fujii et al. 2005)     | A two-generation reproductive toxicity study of diethyl phthalate (DEP) in rats                                                                                             | Crj:CD (SD) IGS rats | dietary dose levels of 0, 600, 3000 and 15000 ppm          | Dietary exposure            | 4 weeks prior mating and throughout the subsequent breeding period until weaning of F1 pups at 3 weeks of age | To evaluate the effects of diethyl phthalate on parental reproductive performance                       |
| Diethyl phthalate | (Yamasaki et al. 2005)  | Two-generation reproductive toxicity studies in rats with extra parameters for detecting endocrine disrupting activity: introductory overview of results for nine chemicals | Sprague-Dawley rats  | at concentrations of 0, 600, 3000 or 15000 ppm in the diet | Dietary exposure            | 10 weeks prior to mating; for females, through gestation and lactation; and through autopsy for both sexes    | To investigate the endocrine-mediated effects of nine chemicals including , diethyl phthalate           |
| Diethyl phthalate | (Shiraishi et al. 2006) | Subacute oral toxicity study of diethylphthalate based on the draft protocol for "Enhanced OECD Test Guideline no. 407"                                                     | Sprague-Dawley rats  | Doses of 0, 40, 200, and 1,000 mg/kg/day                   | Oral gavage                 | 28 days                                                                                                       | To investigate whether DEP has endocrine-mediated properties                                            |
| Diethyl phthalate | (Sonde et al. 2000)     | Simultaneous administration of diethylphthalate and ethyl alcohol and its toxicity in male Sprague-Dawley rats                                                              | Sprague-Dawley rats  | 50 ppm DEP (w/v)                                           | Drinking water              | 120 days                                                                                                      | To evaluate the interactive toxicity of DEP with ethyl alcohol (EtOH) in young male Sprague-Dawley rats |

| <b>Chemicals</b>  | <b>Source</b>          | <b>Title</b>                                                                                        | <b>Animal</b>                                                | <b>Dose</b>                                                                                                                                | <b>Administration route</b> | <b>Duration of exposure</b> | <b>Outcome</b>                                                                                                                                                                                |
|-------------------|------------------------|-----------------------------------------------------------------------------------------------------|--------------------------------------------------------------|--------------------------------------------------------------------------------------------------------------------------------------------|-----------------------------|-----------------------------|-----------------------------------------------------------------------------------------------------------------------------------------------------------------------------------------------|
| Diethyl phthalate | (Field et al. 1993)    | Developmental toxicity evaluation of diethyl and dimethyl phthalate in rats                         | CrI:CD (SD)BR VAF/Plus outbred Sprague-Dawley rats (CD rats) | Doses of 0, 0.25, 2.5, and 5.0% DEP in feed were administered which provided daily doses of approximately 0, 0.20, 1.91, and 3.21 g DEP/kg | Dietary exposure            | Gestational days: 6-15      | Timed-pregnant rats were administered DEP or DMP in feed during organogenesis, and evaluations were made of maternal toxicity and effects on embryoifetal viability, growth and morphogenesis |
| Methyl paraben    | (Vo et al. 2010)       | Potential estrogenic effect(s) of parabens at the prepubertal stage of a postnatal female rat model | Sprague-Dawley rats                                          | 62.5, 250 or 1000 mg/kg BW/day                                                                                                             | Dietary exposure            | Postnatal days: 21-40       | To examine the effects of parabens                                                                                                                                                            |
| Methyl paraben    | (Hoberman et al. 2008) | Lack of effect of butylparaben and methylparaben on the reproductive system in male rats            | Male Wistar rats                                             | Diets containing 0, 100, 1000 or 10,000 ppm                                                                                                | Dietary exposure            | 8 weeks                     | To evaluate potential reproductive effects                                                                                                                                                    |
| Methyl paraben    | (Oishi 2004)           | Lack of spermatotoxic effects of methyl and ethyl esters of p-hydroxybenzoic acid in rats           | Crj:Wistar rats                                              | Doses of 0.1% and 1.0% each in the rat's diet                                                                                              | Dietary exposure            | 8 weeks                     | it is demonstrated that the methyl and ethyl esters of p-hydroxybenzoic acid do not have an adverse effect on male reproductive functions in rats                                             |

## References

- Crofton KM, Paul KB, Devito MJ, Hedge JM. 2007. Short-term in vivo exposure to the water contaminant triclosan: Evidence for disruption of thyroxine. *Environ Toxicol Pharmacol* 24:194–197.
- Field EA, Price CJ, Sleet RB, George JD, Marr MC, Myers CB, et al. 1993. Developmental toxicity evaluation of diethyl and dimethyl phthalate in rats. *Teratology* 48:33–44.
- Fujii S, Yabe K, Furukawa M, Hirata M, Kiguchi M, Ikka T. 2005. A two-generation reproductive toxicity study of diethyl phthalate (DEP) in rats. *J Toxicol Sci* 30 Spec No.:97–116.
- Hoberman AM, Schreur DK, Leazer T, Daston GP, Carthew P, Re T, et al. 2008. Lack of effect of butylparaben and methylparaben on the reproductive system in male rats. *Birth Defects Res B Dev Reprod Toxicol* 83:123–133.
- Jung EM, An BS, Choi KC, Jeung EB. 2012. Potential estrogenic activity of triclosan in the uterus of immature rats and rat pituitary GH3 cells. *Toxicol Lett* 208:142–148.
- Kumar V, Chakraborty A, Kural MR, Roy P. 2009. Alteration of testicular steroidogenesis and histopathology of reproductive system in male rats treated with triclosan. *Reprod Toxicol* 27:177–185.
- Kwack SJ, Kim KB, Kim HS, Lee BM. 2009. Comparative toxicological evaluation of phthalate diesters and metabolites in Sprague–Dawley male rats for risk assessment. *J Toxicol Environ Health A* 72:1446–1454.
- Louis GW, Hallinger DR, Stoker TE. 2013. The effect of triclosan on the uterotrophic response to extended doses of ethinyl estradiol in the weanling rat. *Reprod Toxicol* 36:71–77.
- Oishi S. 2004. Lack of spermatotoxic effects of methyl and ethyl esters of p-hydroxybenzoic acid in rats. *Food Chem Toxicol* 42:1845–1849.
- Paul KB, Hedge JM, Bansal R, Zoeller RT, Peter R, Devito MJ, et al. 2012. Developmental triclosan exposure decreases maternal, fetal, and early neonatal thyroxine: a dynamic and kinetic evaluation of a putative mode-of-action. *Toxicology* 300:31–45.
- Paul KB, Hedge JM, Devito MJ, Crofton KM. 2010a. Developmental triclosan exposure decreases maternal and neonatal thyroxine in rats. *Environ Toxicol Chem* 29:2840–2844.
- Paul KB, Hedge JM, Devito MJ, Crofton KM. 2010b. Short-term exposure to triclosan decreases thyroxine in vivo via upregulation of hepatic catabolism in Young Long–Evans rats. *Toxicol Sci* 113:367–379.
- Pereira C, Mapuskar K, Rao CV. 2007a. Chronic toxicity of diethyl phthalate—A three generation lactational and gestational exposure study on male Wistar rats. *Environ Toxicol Pharmacol* 23:319–327.



Pereira C, Mapuskar K, Vaman RC. 2007b. A two-generation chronic mixture toxicity study of Clophen A60 and diethyl phthalate on histology of adrenal cortex and thyroid of rats. *Acta Histochem* 109:29–36.

Pereira C, Rao CV. 2006. Combined and individual administration of diethyl phthalate and polychlorinated biphenyls and its toxicity in female Wistar rats. *Environ Toxicol Pharmacol* 21:93–102.

Pereira C, Rao CV. 2007. Toxicity study of maternal transfer of polychlorinated biphenyls and diethyl phthalate to 21-day-old male and female weanling pups of Wistar rats. *Ecotoxicol Environ Saf* 68:118–125.

Rodriguez PE, Sanchez MS. 2010. Maternal exposure to triclosan impairs thyroid homeostasis and female pubertal development in Wistar rat offspring. *J Toxicol Environ Health A* 73:1678–1688.

Shiraishi K, Miyata K, Houshuyama S, Imatanaka N, Umamo T, Minobe Y, et al. 2006. Subacute oral toxicity study of diethylphthalate based on the draft protocol for "Enhanced OECD Test Guideline no. 407". *Arch Toxicol* 80:10–16.

Sonde V, D'souza A, Tarapore R, Pereira L, Khare MP, Sinkar P, et al. 2000. Simultaneous administration of diethylphthalate and ethyl alcohol and its toxicity in male Sprague–Dawley rats. *Toxicology* 147:23–31.

Stoker TE, Gibson EK, Zorrilla LM. 2010. Triclosan exposure modulates estrogen-dependent responses in the female wistar rat. *Toxicol Sci* 117:45–53.

Vo TT, Yoo YM, Choi KC, Jeung EB. 2010. Potential estrogenic effect(s) of parabens at the prepubertal stage of a postnatal female rat model. *Reprod Toxicol* 29:306–316.

Wu J, Yue H, Cai Z. 2009. Investigation on metabolism and pharmacokinetics of triclosan in rat plasma by using UPLC–triple quadrupole MS. *Se Pu* 27:724–730.

Yamasaki K, Takahashi M, Yasuda M. 2005. Two-generation reproductive toxicity studies in rats with extra parameters for detecting endocrine disrupting activity: introductory overview of results for nine chemicals. *J Toxicol Sci* 30 Spec No.:1–4.

Zorrilla LM, Gibson EK, Jeffay SC, Crofton KM, Setzer WR, Cooper RL, et al. 2009. The effects of triclosan on puberty and thyroid hormones in male Wistar rats. *Toxicol Sci* 107:56–64.
